# Supplementary material for: The Effect of Alternative Summary Statistics for Communicating Risk Reduction on Decisions about Taking Statins: A Randomized Trial
Source: PubMed Central journal article supplement (PMC2724738; doi:10.1371/journal.pmed.1000134), 2009-08-25
Supplement: pmed.1000134.s003.pdf [file pmed.1000134.s003.pdf]

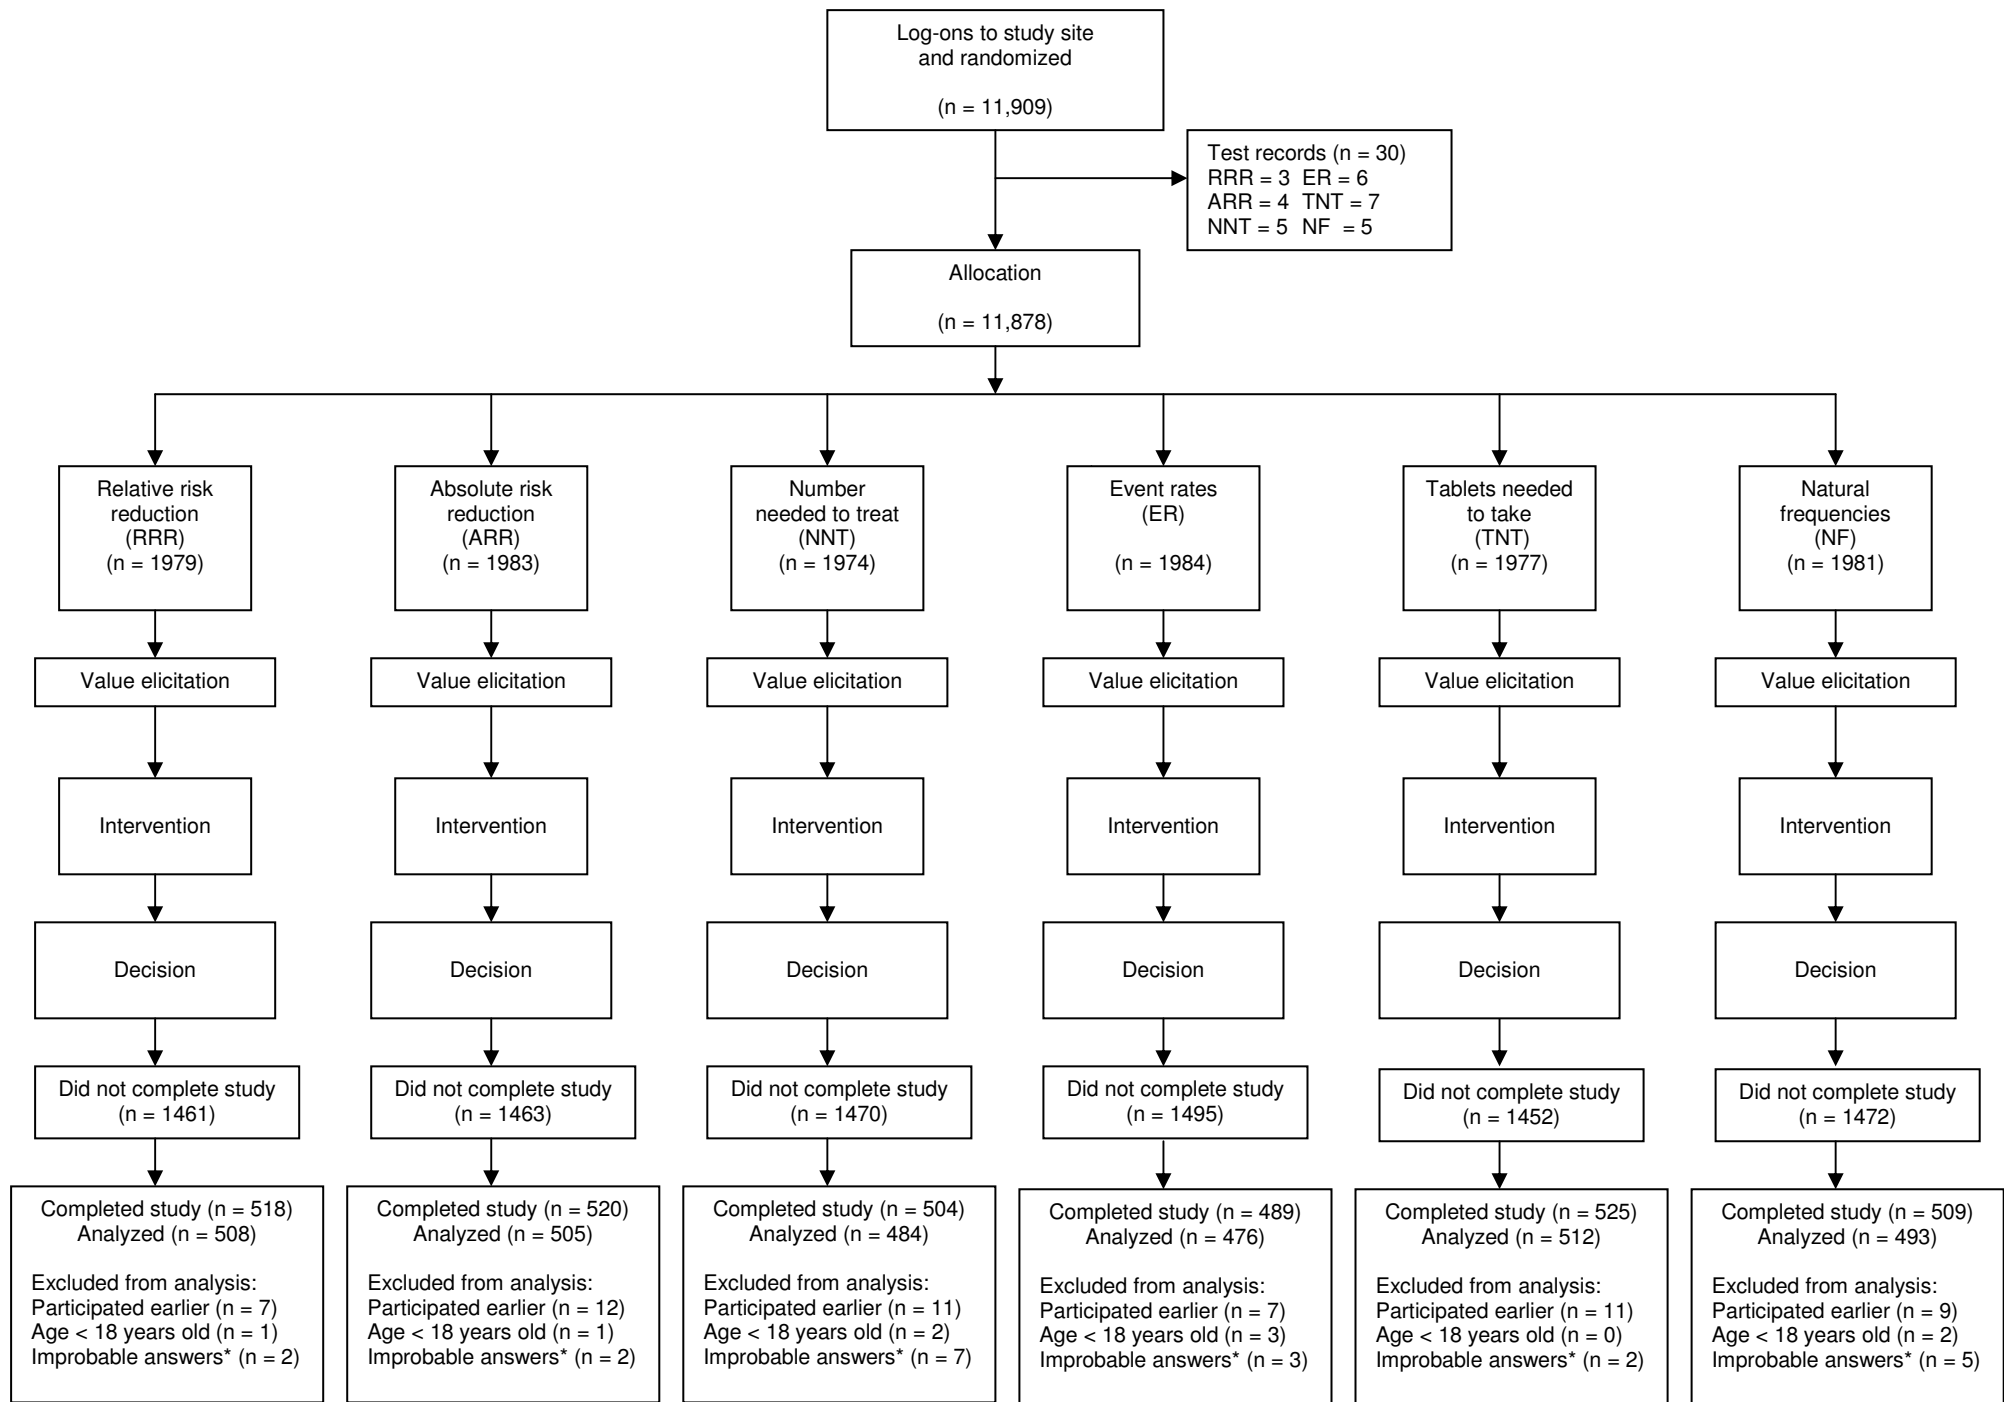

\* The disutility of CHD rated as zero
